# Supplementary material
Source: ML conference proceedings conference paper supplement (https://proceedings.mlr.press/v32/minsker14.html)
Supplement: Supplementary file 1 [file minsker14-supp.pdf]

---

# Supplementary Material for “Scalable and Robust Bayesian Inference via the Median Posterior”

---

Stanislav Minsker<sup>1</sup>  
 Sanvesh Srivastava<sup>2,3</sup>  
 Lizhen Lin<sup>2</sup>  
 David B. Dunson<sup>2</sup>

SMINSKER@MATH.DUKE.EDU  
 SS602@STAT.DUKE.EDU  
 LIZHEN@STAT.DUKE.EDU  
 DUNSON@STAT.DUKE.EDU

Departments of Mathematics<sup>1</sup> and Statistical Science<sup>2</sup>, Duke University, Durham, NC 27708  
 Statistical and Applied Mathematical Sciences Institute<sup>3</sup>, 19 T.W. Alexander Dr, Research Triangle Park, NC 27709

## 1. Proof of Propositions 3.3

For all  $z \in \mathbb{R}$ ,  $|e^{iz} - 1 - iz| \leq \frac{|z|^2}{2}$ , implying that

$$\begin{aligned} \rho_k^2(\theta_1, \theta_2) &= \|k(\cdot, \theta_1) - k(\cdot, \theta_2)\|_{\mathbb{H}}^2 = 2k(0) - 2k(\theta_1 - \theta_2) \\ &= 2 \int_{\mathbb{R}^p} (1 - e^{i\langle x, \theta_1 - \theta_2 \rangle}) d\nu(x) \leq \int_{\mathbb{R}^p} \langle x, \theta_1 - \theta_2 \rangle_{\mathbb{R}^p}^2 d\nu(x) \\ &\leq \|\theta_1 - \theta_2\|_2^2 \int_{\mathbb{R}^p} \|x\|_2^2 d\nu(x), \end{aligned}$$

hence  $\|\theta_1 - \theta_2\|_2 \geq \frac{\rho_k(\theta_1, \theta_2)}{\sqrt{\int_{\mathbb{R}^p} \|x\|_2^2 d\nu(x)}}$ , which implies the result.

## 2. Proof of Theorem 3.4

Let

$$\mathcal{F}_L := \{f : \Theta \mapsto \mathbb{R} \text{ s.t. } \|f\|_L \leq 1\},$$

where  $\|f\|_L := \sup_{\theta_1 \neq \theta_2} \frac{|f(\theta_1) - f(\theta_2)|}{\rho_k(\theta_1, \theta_2)}$  is the Lipschitz constant of  $f$ .

It is well-known ((Dudley, 2002), Theorem 11.8.2) that in this case  $\|P - Q\|_{\mathcal{F}_L}$  is equal to the Wasserstein distance (also called the Kantorovich-Rubinstein distance)

$$d_{W_1}(P, Q) = \inf \left\{ \mathbb{E} \rho(\mathbf{X}, \mathbf{Y}) : \mathcal{L}(\mathbf{X}) = P, \mathcal{L}(\mathbf{Y}) = Q \right\}, \quad (1)$$

where  $\mathcal{L}(\mathbf{Z})$  denotes the law of a random variable  $\mathbf{Z}$  and the infimum on the right is taken over the set of all joint distributions of  $(\mathbf{X}, \mathbf{Y})$  with marginals  $P$  and  $Q$ .

Let  $f \in \mathbb{H}$  - the RKHS associated to kernel  $k$ , and note that, due to the reproducing property and Cauchy-Schwarz inequality, we have

$$\begin{aligned} f(\theta_1) - f(\theta_2) &= \langle f, k(\cdot, \theta_1) - k(\cdot, \theta_2) \rangle_{\mathbb{H}} \\ &\leq \|f\|_{\mathbb{H}} \|k(\cdot, \theta_1) - k(\cdot, \theta_2)\|_{\mathbb{H}} = \|f\|_{\mathbb{H}} \rho_k(\theta_1, \theta_2). \end{aligned}$$

Therefore,  $\mathcal{F}_k \subseteq \mathcal{F}_L$ , hence  $\|P - Q\|_{\mathcal{F}_k} \leq \|P - Q\|_{\mathcal{F}_L}$ . Hence, convergence with respect to  $\|\cdot\|_{\mathcal{F}_L}$  implies convergence with respect to  $\|\cdot\|_{\mathcal{F}_k}$ .

By the definition of Wasserstein distance  $d_{W_1}$ , we have

$$\begin{aligned} d_{W_1}(\delta_0, \Pi_l(\cdot | \mathcal{X}_l)) &= \\ &= \int_{\Theta} \rho_k(\theta, \theta_0) d\Pi_l(\theta | \mathcal{X}_l). \end{aligned} \quad (2)$$

Let  $C_1$  be a large enough constant. Using (2) and assumption 3.1, it is easy to see that

$$\begin{aligned} d_{W_1}(P_0, \Pi_n(\cdot | X_1, \dots, X_n)) \\ \leq \left( \frac{C_1}{\tilde{C}} \varepsilon_n \right)^{1/\gamma} + C_2 \int_{h(P_\theta, P_0) \geq C_1 \varepsilon_n} d\Pi_n(\cdot | X_1, \dots, X_n), \end{aligned}$$

where  $\tilde{C}$  is a constant in assumption 3.1 and  $C_2 = \sup_{\theta_1, \theta_2} \rho_k(\theta_1, \theta_2) \leq \frac{1}{\tilde{C}^{1/\gamma}}$  by assumption 3.1. It remains to estimate the second term in the sum above: this is done exactly as in the proof of Theorem 2.1 in (Ghosal et al., 2000). Following these steps and using the assumption that  $e^{-Kl\varepsilon_l^2/2} \leq \varepsilon_l$ , the result is easily deduced.

## 3. Proof of Corollary 3.5

**Remark 3.1.** The equation and theorem numbers in this proof refer to the main file.

It is enough to apply Theorem 2.1 with  $\nu = 0$  to the independent random measures  $\Pi_l(\cdot | G_j)$ ,  $j = 1, \dots, m$ . Note that the “weak concentration” assumption (3) is implied by (14).

## References

Dudley, Richard M. *Real analysis and probability*, volume 74. Cambridge University Press, 2002.

Ghosal, Subhashis, Ghosh, Jayanta K, and Van Der Vaart, Aad W. Convergence rates of posterior distributions. *Annals of Statistics*, 28(2):500–531, 2000.
